# Supplementary material
Source: PubMed Central journal article supplement (PMC4201296)
Supplement: Supp_Fig1.pdf [file Supp_Fig1.pdf]

## Supplementary Data

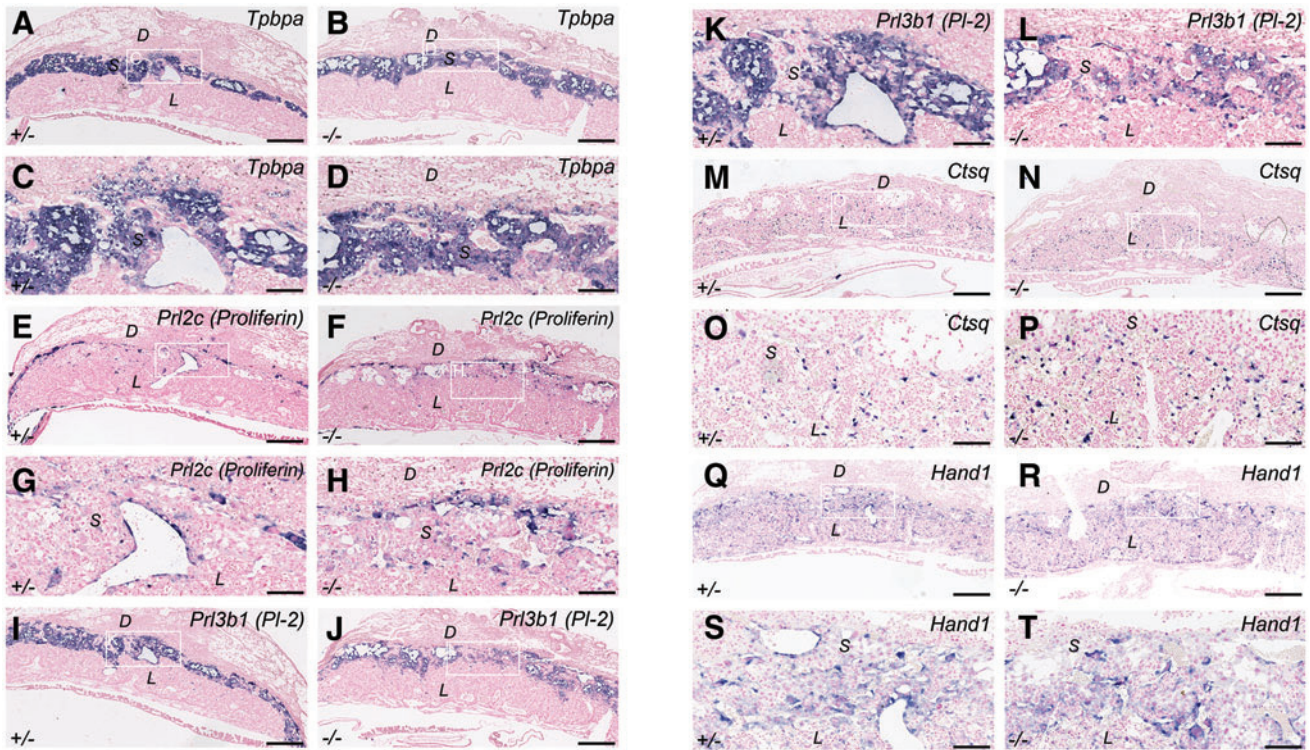

**SUPPLEMENTARY FIG. S1.** In situ hybridization at E12.5. Shown are serial sections of one *Cx31*<sup>+/-</sup> placenta (*left panel*) compared to one *Cx31*<sup>-/-</sup> placenta (*right panel*) hybridized with trophoblast-specific markers. The two littermates were viable at the time of dissection. No obvious differences in spatial distribution of *Tpbpa* (**A–D**), *Prl2c/Plf* (**E–H**), *Prl3b1/Pl-2* (**I–L**), *Ctsq* (**M–P**), and *Hand1* (**Q–T**) could be detected. Thus, surviving placentas appear to have unchanged placental organization compared to controls. Scale bar represent 400  $\mu$ m in **A, B, E, F, I, J, M, N, Q, R**, and 100  $\mu$ m in **C, D, G, H, K, L, O, P, S, T**. *D*, decidua; *L*, labyrinth; *S*, spongiotrophoblast.
